# Supplementary material for: Complete chloroplast genomes suggest a single origin of the Indian subcontinent Sonerila (Melastomataceae)
Source: Research Square preprint supplement (doi:10.21203/rs.3.rs-7538746/v1), 2025-11-05
Supplement: Supplementary file 1 [file 40a1f2ae37831a9494ddea84.docx]

**Table S2. Genes annotated in the chloroplast genomes of 27 *Sonerila* species.**

| **Category of Genes** | **Group of Genes** | **Gene Name** |
| --- | --- | --- |
| Photosynthesis | Subunits of photosystem I | *psaA, psaB, psaC, psaI, psaJ* |
| Subunits of photosystem II | *psbA, psbB, psbC, psbD, psbE, psbF, psbH, psbI, psbJ, psbK, psbL, psbM, psbN, psbT, psbZ* |
| Subunits of cytochrome b/f complex | *petA, petB a, petD a, petG, petL, petN* |
| Subunits of ATP synthase | *atpA, atpB, atpE, atpF a, atpH, atpI* |
| Subunit of rubisco | *rbcL* |
| Subunits of NADH dehydrogenase | *ndhA a, ndhB a* (X2), *ndhC, ndhD, ndhE, ndhF, ndhG, ndhH, ndhI, ndhJ, ndhK* |
| Other genes | Acetyl-CoA carboxylase | *accD* |
| Cytochrome c biogenesis | *ccsA* |
| Envelope membrane protein | *cemA* |
| Maturase | *matK* |
| Protease | *clpP b* |
| Translation initiation factor | *infA* |
| Self-replication | Ribosomal RNAs | *rrn16* (X2), *rrn23* (X2), *rrn4.5* (X2), *rrn5* (X2) |
| Transfer RNAs | *trnA-UGC a* (X2), *trnC-GCA, trnD-GUC, trnE-UUC, trnF-GAA, trnG-UCC, trnH-GUG, trnI-CAU* (X2), *trnI-GAU a* (X2), *trnK-UUU a, trnL-CAA (X2), trnL-UAG, trnL-UAA a, trnM-CAU, trnfM-CAU, trnN-GUU* (X2), *trnP-UGG, trnQ-UUG, trnR-ACG* (X2), *trnR-UCU, trnS-GGA, trnS-GCU, trnS-UGA, trnT-GGU, trnT-UGU, trnV-GAC* (X2), *trnV-UAC a, trnW-CCA, trnY-GUA* |
| Large subunit ribosomal proteins | *rpl2 a* (X2), *rpl14, rpl16 a, rpl20, rpl22, rpl23* (X2), *rpl32, rpl33, rpl36* |
| Small subunit ribosomal proteins | *rps2, rps3, rps4, rps7* (X2), *rps8, rps11, rps12 b* (X2), *rps14, rps15, rps16 a, rps18, rps19* |
| Subunits of RNA polymerase | *rpoA, rpoB, rpoC1 a, rpoC2* |
| Unknown | Conserved hypothetical chloroplast reading frames | *ycf1* (X2), *ycf2* (X2), *ycf3 b, ycf4* |

(x2) Gene with two copies; a Gene with one intron; b Gene with two introns.
