# Supplementary material for: Complete chloroplast genomes suggest a single origin of the Indian subcontinent Sonerila (Melastomataceae)
Source: Research Square preprint supplement (doi:10.21203/rs.3.rs-7538746/v1), 2025-11-05
Supplement: Supplementary file 2 [file 5ca65265c36f52c201b16862.xlsx]

## Sheet: Sheet1
The variability of the eight divergent regions in 27 Sonerila species
Hotspot regions	Pi value	Location	Midpoint	Theta	S
ycf1	0.03484	131171–131791	131491	0.0614	143
rps15	0.02851	128319–129003	128642	0.04929	114
psbE–petL	0.02714	68149–68917	68488	0.04756	110
trnS-GCU–trnR-UCU	0.02653	8538–9288	8962	0.04583	106
rps16–trnQ-UUG	0.02608	6010–6892	6512	0.05362	124
rbcL–accD	0.02567	59673–60359	60011	0.0294	68
rps18–rpl20	0.02532	71970–72676	72352	0.04713	109
The variability of the four divergent regions in 15 Sonerila species
ycf1	0.02084	128364–128976	128669	0.03075	60
rps16	0.02014	4536–5268	4868	0.03024	59
rpl32	0.01594	115488–116232	115918	0.02307	45
rpl22	0.01478	85598–86232	85897	0.02358	46
