# Supplementary material for: Complete chloroplast genomes suggest a single origin of the Indian subcontinent Sonerila (Melastomataceae)
Source: Research Square preprint supplement (doi:10.21203/rs.3.rs-7538746/v1), 2025-11-05
Supplement: Supplementary file 3 [file 7d0fa85911216a789add8001.xlsx]

## Sheet: Sheet1
Amino acid		Ter	Ter	Ter	Ala	Ala	Ala	Ala	Cys	Cys	Asp	Asp	Glu	Glu	Phe	Phe	Gly	Gly	Gly	Gly	His	His	Ile	Ile	Ile	Lys	Lys	Leu	Leu	Leu	Leu	Leu	Leu	Met	Asn	Asn	Pro	Pro	Pro	Pro	Gln	Gln	Arg	Arg	Arg	Arg	Arg	Arg	Ser
		*	*	*	A	A	A	A	C	C	D	D	E	E	F	F	G	G	G	G	H	H	I	I	I	K	K	L	L	L	L	L	L	M	N	N	P	P	P	P	Q	Q	R	R	R	R	R	R	S
Codon		UAA	UAG	UGA	GCA	GCC	GCG	GCU	UGC	UGU	GAC	GAU	GAA	GAG	UUC	UUU	GGA	GGC	GGG	GGU	CAC	CAU	AUA	AUC	AUU	AAA	AAG	CUA	CUC	CUG	CUU	UUA	UUG	AUG	AAC	AAU	CCA	CCC	CCG	CCU	CAA	CAG	AGA	AGG	CGA	CGC	CGG	CGU	AGC
RSCU	Sonerila cannanorensis	1.2	0.77	1.03	1.14	0.89	0.69	1.28	0.83	1.17	0.61	1.39	1.38	0.62	0.79	1.21	1.38	0.62	1.06	0.93	0.58	1.42	1.02	0.74	1.24	1.36	0.64	0.9	0.79	0.52	1.26	1.25	1.28	1	0.61	1.39	1.24	1.02	0.7	1.04	1.41	0.59	1.93	1.09	1.1	0.43	0.74	0.71	0.68
	Sonerila ponmudiana	1.22	0.78	1.01	1.19	0.91	0.72	1.18	0.81	1.19	0.55	1.45	1.35	0.65	0.79	1.21	1.41	0.65	0.97	0.96	0.62	1.38	0.98	0.74	1.28	1.35	0.65	0.94	0.73	0.54	1.26	1.23	1.29	1	0.6	1.4	1.21	1.08	0.67	1.04	1.46	0.54	1.9	1.06	1.15	0.43	0.74	0.72	0.61
	Sonerila speciosa	1.23	0.81	0.95	1.17	0.93	0.66	1.24	0.83	1.17	0.58	1.42	1.35	0.65	0.8	1.2	1.33	0.69	1.02	0.96	0.58	1.42	0.99	0.76	1.25	1.36	0.64	0.94	0.76	0.54	1.26	1.17	1.33	1	0.62	1.38	1.25	1.04	0.68	1.03	1.42	0.58	1.91	1.07	1.17	0.44	0.72	0.7	0.59
	Sonerila sreenarayaniana	1.19	0.83	0.98	1.18	0.88	0.65	1.3	0.79	1.21	0.58	1.42	1.38	0.62	0.78	1.22	1.4	0.68	1.02	0.91	0.61	1.39	1.03	0.73	1.24	1.34	0.66	0.95	0.75	0.55	1.19	1.3	1.26	1	0.59	1.41	1.24	1.03	0.68	1.05	1.4	0.6	1.95	1.09	1.09	0.46	0.73	0.67	0.62
	Sonerila janakiana	1.22	0.86	0.92	1.05	0.98	0.68	1.28	0.81	1.19	0.53	1.47	1.38	0.62	0.79	1.21	1.4	0.66	1.04	0.9	0.59	1.41	1.01	0.73	1.25	1.35	0.65	0.99	0.73	0.54	1.24	1.25	1.26	1	0.58	1.42	1.23	1	0.75	1.02	1.41	0.59	1.89	1.12	1.07	0.49	0.74	0.69	0.6
	Sonerila malabrica	1.12	0.73	1.15	1.23	0.83	0.61	1.33	0.83	1.17	0.56	1.44	1.37	0.63	0.77	1.23	1.5	0.57	0.96	0.96	0.62	1.38	1.02	0.76	1.22	1.42	0.58	0.9	0.75	0.46	1.2	1.46	1.24	1	0.56	1.44	1.24	0.99	0.65	1.12	1.47	0.53	2.05	1.04	1.07	0.43	0.65	0.76	0.58
	Sonerila amabills	1.22	0.77	1.01	1.15	0.89	0.62	1.34	0.83	1.17	0.59	1.41	1.36	0.64	0.78	1.22	1.52	0.54	0.98	0.95	0.56	1.44	1	0.74	1.26	1.36	0.64	0.94	0.77	0.48	1.22	1.27	1.32	1	0.6	1.4	1.22	1.07	0.67	1.04	1.42	0.58	1.9	1.06	1.09	0.5	0.72	0.73	0.61
	Sonerila lateritica	1.19	0.77	1.05	1.19	0.9	0.61	1.3	0.75	1.25	0.57	1.43	1.34	0.66	0.77	1.23	1.4	0.62	1.04	0.95	0.63	1.37	1.01	0.71	1.28	1.39	0.61	0.92	0.73	0.55	1.21	1.31	1.28	1	0.59	1.41	1.24	1.02	0.69	1.05	1.42	0.58	2	1.01	1.13	0.42	0.74	0.7	0.54
	Sonerila tenella	1.21	0.82	0.97	1.17	0.9	0.61	1.32	0.81	1.19	0.55	1.45	1.36	0.64	0.75	1.25	1.43	0.58	1.06	0.93	0.55	1.45	1.03	0.7	1.27	1.37	0.63	0.98	0.74	0.53	1.3	1.28	1.17	1	0.59	1.41	1.24	1.01	0.73	1.02	1.39	0.61	1.85	1.04	1.1	0.47	0.78	0.76	0.55
	Sonerila veldkampiana	1.19	0.8	1.01	1.2	0.85	0.65	1.3	0.79	1.21	0.58	1.42	1.39	0.61	0.77	1.23	1.41	0.6	1.02	0.97	0.58	1.42	1.01	0.71	1.28	1.39	0.61	0.97	0.72	0.51	1.29	1.34	1.18	1	0.59	1.41	1.19	1.04	0.66	1.11	1.43	0.57	1.91	1.02	1.16	0.45	0.72	0.75	0.6
	Sonerila rheedei	1.19	0.81	1	1.11	0.94	0.72	1.23	0.81	1.19	0.58	1.42	1.35	0.65	0.81	1.19	1.41	0.67	1.03	0.89	0.67	1.33	0.98	0.74	1.28	1.34	0.66	0.92	0.76	0.56	1.26	1.18	1.32	1	0.61	1.39	1.26	1.05	0.7	0.99	1.42	0.58	1.98	1.06	1.04	0.5	0.76	0.67	0.58
	Sonerila sadasivanii	1.17	0.78	1.05	1.19	0.88	0.62	1.31	0.83	1.17	0.59	1.41	1.36	0.64	0.78	1.22	1.39	0.64	0.99	0.97	0.58	1.42	1.02	0.78	1.2	1.37	0.63	0.93	0.75	0.49	1.25	1.3	1.28	1	0.58	1.42	1.19	1.05	0.71	1.04	1.45	0.55	1.95	0.98	1.17	0.43	0.68	0.78	0.59
	Sonerila tinnevellinensis	1.14	0.79	1.07	1.19	0.9	0.61	1.3	0.84	1.16	0.51	1.49	1.39	0.61	0.78	1.22	1.49	0.61	0.96	0.94	0.57	1.43	0.99	0.72	1.29	1.4	0.6	0.92	0.78	0.51	1.26	1.34	1.2	1	0.6	1.4	1.19	1.04	0.66	1.11	1.44	0.56	2	1.09	1.09	0.44	0.68	0.71	0.58
	Sonerila brunonis	1.17	0.84	0.99	1.13	1	0.64	1.23	0.83	1.17	0.54	1.46	1.36	0.64	0.8	1.2	1.42	0.61	1.02	0.95	0.61	1.39	0.98	0.74	1.28	1.39	0.61	0.92	0.76	0.53	1.26	1.25	1.28	1	0.61	1.39	1.27	1.07	0.66	1.01	1.45	0.55	1.94	1.08	1.13	0.45	0.7	0.71	0.65
	Sonerila axillaries	1.21	0.75	1.06	1.14	0.93	0.63	1.29	0.81	1.19	0.54	1.46	1.39	0.61	0.77	1.23	1.42	0.63	0.95	1	0.59	1.41	1	0.75	1.25	1.41	0.59	0.92	0.74	0.46	1.22	1.34	1.32	1	0.59	1.41	1.28	1.06	0.66	1.01	1.46	0.54	2.03	1.06	1.09	0.41	0.63	0.77	0.62
	Sonerila cantonensis_1	1.19	0.81	0.99	1.22	0.88	0.58	1.32	0.76	1.24	0.59	1.41	1.37	0.63	0.76	1.24	1.36	0.66	1.02	0.96	0.56	1.44	1.01	0.74	1.25	1.38	0.62	0.95	0.7	0.55	1.26	1.27	1.27	1	0.58	1.42	1.19	1.04	0.67	1.1	1.37	0.63	1.89	1.12	1.14	0.44	0.69	0.72	0.61
	Sonerila cantonensis_2	1.21	0.73	1.06	1.16	0.88	0.66	1.3	0.81	1.19	0.57	1.43	1.39	0.61	0.78	1.22	1.41	0.63	0.99	0.97	0.58	1.42	0.99	0.75	1.27	1.39	0.61	0.84	0.77	0.52	1.26	1.3	1.3	1	0.59	1.41	1.21	1.03	0.63	1.13	1.43	0.57	1.98	1.13	1.09	0.43	0.63	0.75	0.67
	Sonerila plagiocardia	1.2	0.81	0.99	1.2	0.93	0.67	1.2	0.84	1.16	0.55	1.45	1.38	0.62	0.79	1.21	1.42	0.62	0.96	1	0.59	1.41	0.98	0.79	1.23	1.37	0.63	0.87	0.76	0.49	1.26	1.33	1.28	1	0.59	1.41	1.25	1.07	0.61	1.07	1.47	0.53	2	1.05	1.04	0.48	0.65	0.77	0.65
	Sonerila pulchella	1.14	0.78	1.08	1.15	0.86	0.65	1.33	0.74	1.26	0.58	1.42	1.34	0.66	0.78	1.22	1.43	0.58	1.01	0.98	0.59	1.41	1.01	0.73	1.26	1.38	0.62	0.96	0.75	0.49	1.26	1.34	1.21	1	0.59	1.41	1.2	1.06	0.66	1.08	1.44	0.56	1.96	1	1.15	0.45	0.71	0.74	0.53
	Sonerila velutina	1.2	0.85	0.95	1.15	0.85	0.69	1.31	0.77	1.23	0.61	1.39	1.37	0.63	0.8	1.2	1.4	0.6	1.05	0.94	0.54	1.46	1.01	0.76	1.23	1.35	0.65	0.88	0.75	0.6	1.25	1.29	1.23	1	0.59	1.41	1.22	1.01	0.69	1.08	1.36	0.64	1.83	1.06	1.17	0.46	0.71	0.76	0.61
	Sonerila borneensis	1.19	0.77	1.04	1.09	0.94	0.7	1.26	0.82	1.18	0.57	1.43	1.38	0.62	0.82	1.18	1.43	0.62	0.94	1	0.63	1.37	1.02	0.75	1.23	1.36	0.64	0.92	0.78	0.53	1.18	1.28	1.32	1	0.6	1.4	1.26	1.05	0.68	1	1.43	0.57	1.94	1	1.12	0.49	0.72	0.73	0.59
	Sonerila parviflora	1.16	0.82	1.01	1.09	0.97	0.65	1.28	0.85	1.15	0.6	1.4	1.37	0.63	0.8	1.2	1.41	0.59	1.04	0.95	0.58	1.42	1	0.75	1.25	1.37	0.63	0.88	0.75	0.57	1.25	1.29	1.26	1	0.6	1.4	1.28	1.03	0.66	1.03	1.45	0.55	1.8	1.08	1.19	0.47	0.68	0.79	0.61
	Sonerila cantonensis_3	1.13	0.77	1.1	1.21	0.88	0.62	1.28	0.78	1.22	0.55	1.45	1.37	0.63	0.77	1.23	1.39	0.6	1.01	1	0.58	1.42	1.01	0.71	1.28	1.37	0.63	0.95	0.8	0.45	1.25	1.34	1.2	1	0.59	1.41	1.22	1.06	0.67	1.05	1.44	0.56	2.05	1	1.11	0.42	0.7	0.72	0.53
	Sonerila obliqua	1.18	0.74	1.08	1.23	0.82	0.62	1.33	0.8	1.2	0.6	1.4	1.37	0.63	0.8	1.2	1.41	0.6	1.01	0.97	0.63	1.37	0.99	0.79	1.22	1.38	0.62	0.89	0.78	0.48	1.26	1.27	1.32	1	0.6	1.4	1.24	1.02	0.68	1.06	1.42	0.58	1.98	1.06	1.07	0.46	0.67	0.77	0.58
	Sonerila annamica	1.14	0.8	1.06	1.11	0.94	0.63	1.33	0.77	1.23	0.62	1.38	1.34	0.66	0.79	1.21	1.42	0.65	1.03	0.91	0.6	1.4	0.99	0.77	1.25	1.37	0.63	0.9	0.75	0.52	1.25	1.27	1.31	1	0.6	1.4	1.24	1.02	0.7	1.05	1.41	0.59	1.88	1.11	1.16	0.43	0.68	0.74	0.55
	Sonerila nervulosa_1	1.16	0.81	1.03	1.19	0.99	0.65	1.17	0.86	1.14	0.58	1.42	1.38	0.62	0.82	1.18	1.36	0.66	1.1	0.88	0.6	1.4	1	0.76	1.23	1.37	0.63	0.93	0.77	0.54	1.21	1.24	1.32	1	0.6	1.4	1.22	0.99	0.72	1.07	1.43	0.57	1.92	1.1	1.05	0.46	0.74	0.73	0.6
	Sonerila nervulosa_2	1.18	0.82	0.99	1.19	0.94	0.67	1.2	0.84	1.16	0.57	1.43	1.39	0.61	0.81	1.19	1.37	0.68	1.07	0.88	0.59	1.41	1.02	0.76	1.22	1.35	0.65	0.94	0.78	0.55	1.22	1.18	1.33	1	0.63	1.37	1.24	0.99	0.74	1.04	1.43	0.57	1.91	1.08	1.05	0.44	0.77	0.74	0.61
[truncated: 16 more columns]
