# Supplementary material for: Complete chloroplast genomes suggest a single origin of the Indian subcontinent Sonerila (Melastomataceae)
Source: Research Square preprint supplement (doi:10.21203/rs.3.rs-7538746/v1), 2025-11-05
Supplement: Supplementary file 4 [file ad4275d1766737cc5a0c8a83.xlsx]

## Sheet: Sheet1
Species	Location	Voucher accession No.	NCBI access no.	Field No. & Collected by
Tribe Sonerileae
Sonerila cannanorensis	Pakranthalam Ghat, way to Mananthavady, Kozhikode district, Kerala	25083 (CALI & FRC)	PX251189	S. Resmi, T. Priyanka & Santhosh Nampy168201
Sonerila ponmudiana	Ponmudi hills, Thiruvananthapuram district, Kerala	25082 (CALI & FRC)	PX251190	S. Resmi & Santhosh Nampy164412
Sonerila speciosa	Nilgiris, Korakundha, The Nilgiris district, Tamil Nadu	25080 (CALI & FRC)	PX251191	S. Resmi & Santhosh Nampy164465
Sonerila sreenarayaniana	Anakkayam, Sholayar, Thrissur district, Kerala	25060 (CALI & FRC)	PX251192	S. Resmi & Santhosh Nampy168235
Sonerila janakiana	Nadukani Ghat, The Nilgiris district, Tamil Nadu	25061 (CALI & FRC)	PX251193	S. Resmi, V. Veena & Santhosh Nampy143837
Sonerila malabrica	Way to Kakkayam dam, Kozhikode district, Kerala	25081 (CALI & FRC)	PX251194	S. Resmi, Manu Philip & K. Jithin143881
Sonerila amabills	Gangtok, Sikkim	25077 (CALI & FRC)	PX251195	Nikhil Krishna, S. Resmi & Santhosh Nampy151300
Sonerila lateritica	Ponkunnu hills, Kakkoor, Kozhikode district, Kerala	25067 (CALI & FRC)	PX251196	S. Resmi & M.P. Krishnapriya164410
Sonerila tenella	Anamalai, Upper Sholayar to Valpparai road, Coimbatore district, Tamil Nadu	25072 (CALI & FRC)	PX251197	S. Resmi & Santhosh Nampy168251
Sonerila veldkampiana	Nelliampathy hills, near seconf view point, Palakkad district, Kerala	25062 (CALI & FRC)	PX251198	S. Resmi & Santhosh Nampy168294
Sonerila rheedei	Vazhachal-Athirappilly, Thrissur district, Kerala	25070 (CALI & FRC)	PX251199	S. Resmi, T. Priyanka & Santhosh Nampy143873
Sonerila sadasivanii	Near Nalumukku bridge, Upper Kodayar, Thirunelveli district, Tamil Nadu	25079 (CALI & FRC)	PX251200	S. Resmi & Santhosh Nampy168264
Sonerila tinnevellinensis	Agasthyamalai, Thiruvananthapuram district, Kerala	25078 (CALI & FRC)	PX251201	S. Resmi, K.M. Manudev & Nikhil Krishna151271
Sonerila brunonis	Valpparai road, Coimatore district, Tamil Nadu	25068 (CALI & FRC)	PX251202	S. Resmi & Santhosh Nampy164485
Sonerila axillaries	Way to Malakkappara, Thrissur district, Kerala	25057 (CALI & FRC)	PX251203	S. Resmi & Santhosh Nampy151249
Sonerila cantonensis_1	Lingshui, hainan, China	Liu 449 (SYS)	MK994791
Sonerila cantonensis_2	Malipo, Yunnan, China	Liu 510 (SYS)	MK994813
Sonerila cantonensis_3	Fengkai, Guanghzou, China	Liu 445 (SYS)	OL813666
Sonerila plagiocardia	Jinping, Yunnan, China	Liu 642 (SYS)	MK994876
Sonerila pulchella	Sabah, Malaysia	Liu 668 (SYS)	MK994884
Sonerila velutina	Sarawak, Malaysia	Liu 683 (SYS)	MK994892
Sonerila borneensis	Sarawak, Malaysia	Liu 684 (SYS)	MK994893
Sonerila parviflora	Sarawak, Malaysia	Liu 700 (SYS)	MK994900
Sonerila obliqua	Sarawak, Malaysia	Liu 682 (SYS)	OL813672
Sonerila annamica	Bi doup Nui Ba, Vietnam	Liu 834 (SYS)	OL813695
Sonerila nervulosa_1	Sabah, Malaysia	C.W. Lin 705 (TAIF)	OL813716
Sonerila nervulosa_2	Sabah, Malaysia	Liu 666 (SYS)	OL813725
Fordiophyton phamhoangii	Dai Loc, Vietnam	Liu 820 (SYS)	OL813693
Fordiophyton repens	Pingbian, Yunnan, China	Liu 513 (SYS)	MK994815
Fordiophyton peperomiifolium	Qingyuan, Guangdong, China	Liu 432 (SYS)	MK994785
Cyphotheca montana	Jinping, Yunnan, China	Liu 596 (SYS)	MK994852
Phyllagathis griffithii	Malaysia	W.L. Ng s.n. (SYS)	OL813744
Allomorphia arborescens	Tam Dao, Vietnam	Liu 793 (SYS)	OL813680
Allomorphia urophylla	Jinping, Yunnan, China	Liu 718 (SYS)	MK994903
Styrophyton caudatum	Pingbian, Yunnan, China	Liu 591 (SYS)	OL813668
Blastus cochinchinensis	Fengkai, Guanghzou, China	Liu 446 (SYS)	MK994909
Blastus eglandulosus	Tam Dao, Vietnam	Liu 792 (SYS)	OL813679
Sporoxeia clavicalcarata	Malipo, Yunnan, China	Liu 712 (SYS)	OL813674
Plagiopetalum esquirolii	Malipo, Yunnan, China	Liu 714 (SYS)	OL813675
Bredia hirsuta	Okinawa, Japan	Liu 634 (SYS)	MK994872
Bredia tuberculata	Emei, Sichuan, China	Liu 579 (SYS)	MK994841
Bredia fordii	Fengkai, Guanghzou, China	Liu 444 (SYS)	MK994790
Bredia violacea	Northern Vietanam	Liu 788 (SYS)	OL813678
Kerriothyrsus tetrandrus	Vu Quang, Vietnam	Liu 794 (SYS)	OL813681
Phyllagathis elattandra	Guiping, Guangxi, China	Liu 554 (SYS)	MK994830
Phyllagathis rotundifolia	Kuala Lumpur, Malasysia	Zhou et al. M50 (SYS)	MK994912
Sarcopyramis nepalensis	Shuifu, Yunnan, China	Liu 628 (SYS)	MK994868
Oxyspora paniculata	Baoshan, Yunnan, China	Liu 583 (SYS)	OL813721
Barthea barthei	Shenzhen, China	Y.C. Cai s.n. (SYS)	MK994907
Phyllagathis setotheca var. setotuba	Yangchun, Guangzhou, China	Liu 576 (SYS)	MK994840
Phyllagathis xinyiensis	Xinyi, Guangzhou, China	Liu 582 (SYS)	MK994844
Phyllagathis elliptica	Sabah, Malaysia	Liu 652 (SYS)	OL813671
Medinilla beamanii	Sabah, Malaysia	Liu 658 (SYS)	MK994880
Medinilla speciosa	Sabah, Malaysia	C.W. Lin 697 (TAIF)	OL813711
Medinilla petelotii	Malipo, Yunnan, China	Liu 589 (SYS)	MK994847
Plethiandra robusta	Sarawak, Malaysia	C.W. Lin 681 (TAIF)	OL813707
Heteroblemma serpens	Sarawak, Malaysia	Liu 671 (SYS)	MK994886
Phyllagathis longifolia	Sarawak, Malaysia	Liu 688 (SYS)	OL813673
Driessenia glanduligera	Sabah, Malaysia	Liu 657 (SYS)	MK994879
Driessenia axantha	Kuching, Malaysia	Zhou et al. M26 (SYS)	OL813740
Phyllagathis stellata	Sarawak, Malaysia	C.W. Lin 643 (TAIF)	MK994920
Tigridiopalma magnifica	Gaozhou, Guangdong, China	Liu 429 (SYS)	MF663760
Tashiroea bigiandularis	Fangcheng, Guangxi, China	Liu 553 (SYS)	MK994829
Tashiroea sinensis	Pinnan, Fujian, China	Liu 569 (SYS)	MK994837
Scorpiothyrsus oligotrichus	Ledong, Hainan, China	Liu 454 (SYS)	MK994794
Vietsenia poilanei	Nam Dong, Vietnam	Liu 805 (SYS)	OL813682
Phyllagathis megalocentra	Bi doup Nui Ba, Vietnam	Liu 840 (SYS)	OL813699
Poilannammia allomorphioidea	Bi doup Nui Ba, Vietnam	Liu 837 (SYS)	OL813698
Amphiblemma cymosum			OL813705
Gravesia subglobosa	Madagascar	Wang 3761 (IBSC)	OL813720
Anerincleistus quintuplinervis	Sarawak, Malaysia	Liu 662 (SYS)	OL813724
Anerincleistus macrophyllus	Sarawak, Malaysia	Liu 699 (SYS)	OL813731
Tribe Dissochaeteae
Daienia sarawakensis	Sabah, Malaysia	Liu 656 (SYS)	OL813723
Dissochaeta gracilis	Java, Indonesia	Fan 15704 (SYS)	MK994855
Tribe Blakeeae
Blakea schlimii			KX826821
Tribe Melastomateae
Melastoma candidum			PP938633
