# Supplementary material for: Complete chloroplast genomes suggest a single origin of the Indian subcontinent Sonerila (Melastomataceae)
Source: Research Square preprint supplement (doi:10.21203/rs.3.rs-7538746/v1), 2025-11-05
Supplement: Supplementary file 5 [file d7b6d5b3c1ce0cb7a495ea86.xlsx]

## Sheet: Sheet1
Species	Sample_alias	BioProject_accession	BioSample_accession	SRA_accession	SRA_Study	GenBank_plastome_accession
Sonerila cannanorensis	SC-168201	PRJNA1306189	SAMN50682086	SRR35143099	SRP612796	PX251189
Sonerila ponmudiana	SP-164412	PRJNA1306189	SAMN50682268	SRR35143098	SRP612796	PX251190
Sonerila speciosa	SS-164465	PRJNA1306189	SAMN50682916	SRR35143092	SRP612796	PX251191
Sonerila sreenarayaniana	SS-168235	PRJNA1306189	SAMN50684932	SRR35143091	SRP612796	PX251192
Sonerila janakiana	SJ-143837	PRJNA1306189	SAMN50684960	SRR35143090	SRP612796	PX251193
Sonerila malabarica	SM-143881	PRJNA1306189	SAMN50685472	SRR35143089	SRP612796	PX251194
Sonerila amabilis	SA-151300	PRJNA1306189	SAMN50685875	SRR35143088	SRP612796	PX251195
Sonerila lateritica	SL-164410	PRJNA1306189	SAMN50685883	SRR35143087	SRP612796	PX251196
Sonerila tenella	ST-168251	PRJNA1306189	SAMN50685908	SRR35143086	SRP612796	PX251197
Sonerila veldkampiana	SV-168294	PRJNA1306189	SAMN50685982	SRR35143085	SRP612796	PX251198
Sonerila rheedei	SR-143873	PRJNA1306189	SAMN50685985	SRR35143097	SRP612796	PX251199
Sonerila sadasivanii	SS-168264	PRJNA1306189	SAMN50685989	SRR35143096	SRP612796	PX251200
Sonerila tinnevelliensis	ST-151271	PRJNA1306189	SAMN50686044	SRR35143095	SRP612796	PX251201
Sonerila brunonis	SB-164485	PRJNA1306189	SAMN50686055	SRR35143094	SRP612796	PX251202
Sonerila axillaris	SA-151249	PRJNA1306189	SAMN50686056	SRR35143093	SRP612796	PX251203
